# Supplementary material for: Influence of MUC5B gene on antisynthetase syndrome
Source: PubMed Central journal article supplement (PMC6989632; doi:10.1038/s41598-020-58400-0), 2020-01-29
Supplement: 41598_2020_58400_MOESM1_ESM.pdf [file 41598_2020_58400_MOESM1_ESM.pdf]

## **Influence of *MUC5B* gene on antisynthetase syndrome**

Raquel López-Mejías<sup>1\*¶</sup>, Sara Remuzgo-Martínez<sup>1¶</sup>, Fernanda Genre<sup>1¶</sup>, Verónica Pulito-Cueto<sup>1</sup>, Sonia M. Fernández Rozas<sup>1</sup>, Javier Llorca<sup>2</sup>, David Iturbe Fernández<sup>1</sup>, Víctor M. Mora Cuesta<sup>1</sup>, Norberto Ortego-Centeno<sup>3</sup>, Nair Pérez Gómez<sup>4</sup>, Antonio Mera-Varela<sup>4</sup>, Julia Martínez-Barrio<sup>5</sup>, Francisco Javier López-Longo<sup>5</sup>, Verónica Mijares<sup>1</sup>, Leticia Lera-Gómez<sup>1</sup>, María Piedad Usetti<sup>6</sup>, Rosalía Laporta<sup>6</sup>, Virginia Pérez<sup>7</sup>, Alicia De Pablo Gafas<sup>7</sup>, María Aránzazu Alfranca González<sup>8</sup>, Jaime Calvo-Alén<sup>9</sup>, Fredeswinda Romero-Bueno<sup>10</sup>, Olga Sanchez-Pernaute<sup>10</sup>, Laura Nuño<sup>11</sup>, Gema Bonilla<sup>11</sup>, Alejandro Balsa<sup>11</sup>, Fernanda Hernández-González<sup>12</sup>, Ignacio Grafía<sup>13</sup>, Sergio Prieto-González<sup>13</sup>, Javier Narvaez<sup>14</sup>, Ernesto Trallero-Araguas<sup>15</sup>, Albert Selva-O'Callaghan<sup>15</sup>, Oreste Gualillo<sup>16</sup>, Santos Castañeda<sup>17</sup>, Lorenzo Cavagna<sup>18</sup>, José M. Cifrian<sup>1§</sup>, Miguel A. González-Gay<sup>1,19,20§</sup>

**Supplementary Table 1.** Genotype and allele frequencies of *MUC5B* rs35705950 in ASSD-ILD+ patients and patients with ILD unrelated to ASSD.

| <i>MUC5B</i> rs35705950                      | Genotypes  |            |          | Alleles    |            | Allele test       |                          |
|----------------------------------------------|------------|------------|----------|------------|------------|-------------------|--------------------------|
|                                              | GG         | GT         | TT       | G          | T          | p                 | OR [95% CI] <sup>a</sup> |
| ASSD-ILD+, % (n)                             | 79.6 (113) | 19.7 (28)  | 0.7 (1)  | 89.4 (254) | 10.6 (30)  | <b>&lt;0.0001</b> | 0.21 [0.13-0.33]         |
| Whole cohort of ILD unrelated to ASSD, % (n) | 37.5 (87)  | 53.4 (124) | 9.1 (21) | 64.2 (298) | 35.8 (166) |                   |                          |
| ASSD-ILD+, % (n)                             | 79.6 (113) | 19.7 (28)  | 0.7 (1)  | 89.4 (254) | 10.6 (30)  | <b>&lt;0.0001</b> | 0.21 [0.13-0.33]         |
| IPF, % (n)                                   | 34.4 (56)  | 58.8 (94)  | 6.9 (11) | 63.9 (206) | 36.0 (116) |                   |                          |
| ASSD-ILD+, % (n)                             | 79.6 (113) | 19.7 (28)  | 0.7 (1)  | 89.4 (254) | 10.6 (30)  | <b>&lt;0.0001</b> | 0.26 [0.12-0.55]         |
| RA-ILD, % (n)                                | 48.1 (13)  | 40.7 (11)  | 11.1 (3) | 68.5 (37)  | 31.5 (17)  |                   |                          |
| ASSD-ILD+, % (n)                             | 79.6 (113) | 19.7 (28)  | 0.7 (1)  | 89.4 (254) | 10.6 (30)  | <b>&lt;0.0001</b> | 0.20 [0.11-0.36]         |
| CHP, % (n)                                   | 40.9 (18)  | 43.2 (19)  | 15.9 (7) | 62.5 (55)  | 37.5 (33)  |                   |                          |

ASSD: antisynthetase syndrome; ILD: interstitial lung disease; OR: odds ratio; CI: confidence interval; IPF: idiopathic pulmonary fibrosis; RA: rheumatoid arthritis; CHP: chronic hypersensitivity pneumonitis.

Statistically significant results are highlighted in **bold**.

<sup>a</sup>For the minor allele.
